# Supplementary figures and images for: miRNA Expression Analysis: Cell Lines HCC1500 and HCC1937 as Models for Breast Cancer in Young Women and the miR-23a as a Poor Prognostic Biomarker
Source: PubMed Central journal article supplement — Breast Cancer (Auckl). 2020 Dec 2;14:1178223420977845. doi: 10.1177/1178223420977845 (PMC7716059; doi:10.1177/1178223420977845), 2020-12-02

# Supplementary Figure 1

A)

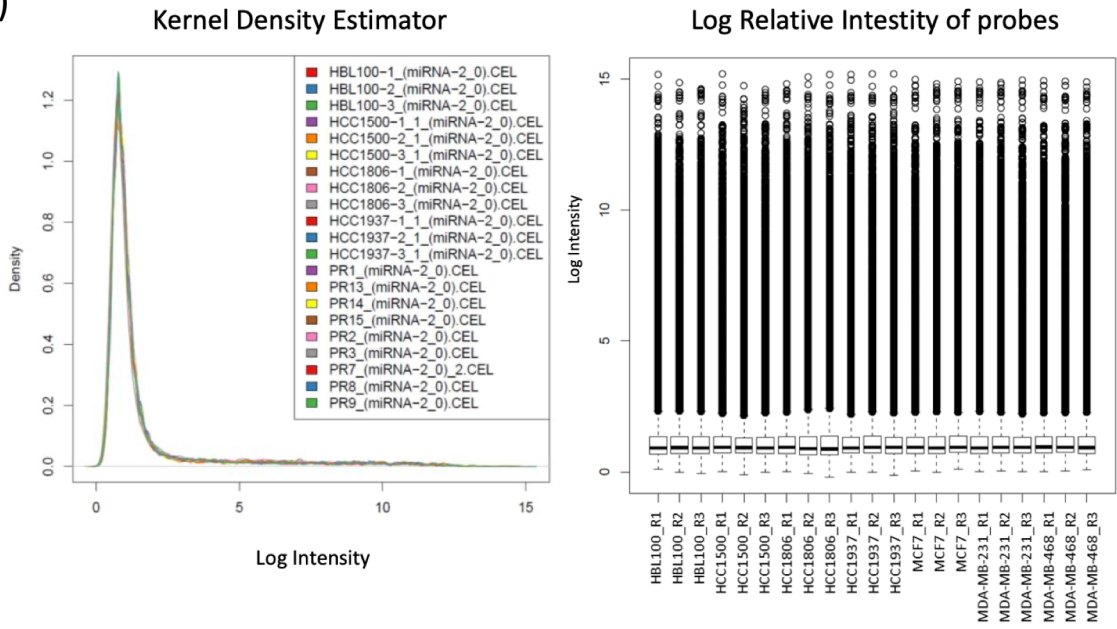

B)

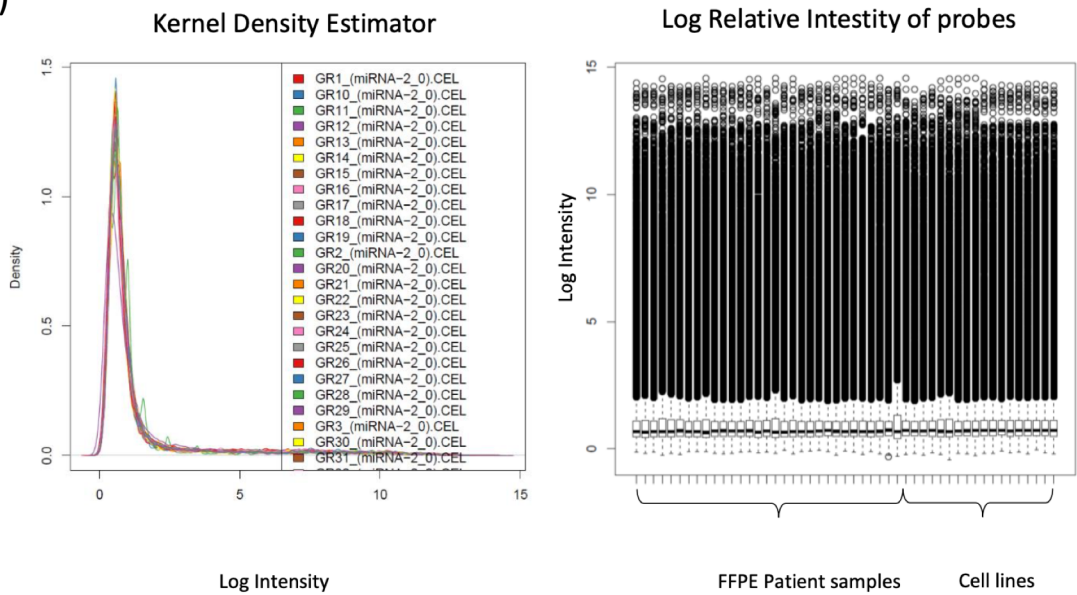

Supplement: sj-pdf-1-bcb-10.1177_1178223420977845.pdf [file sj-pdf-1-bcb-10.1177_1178223420977845.pdf]

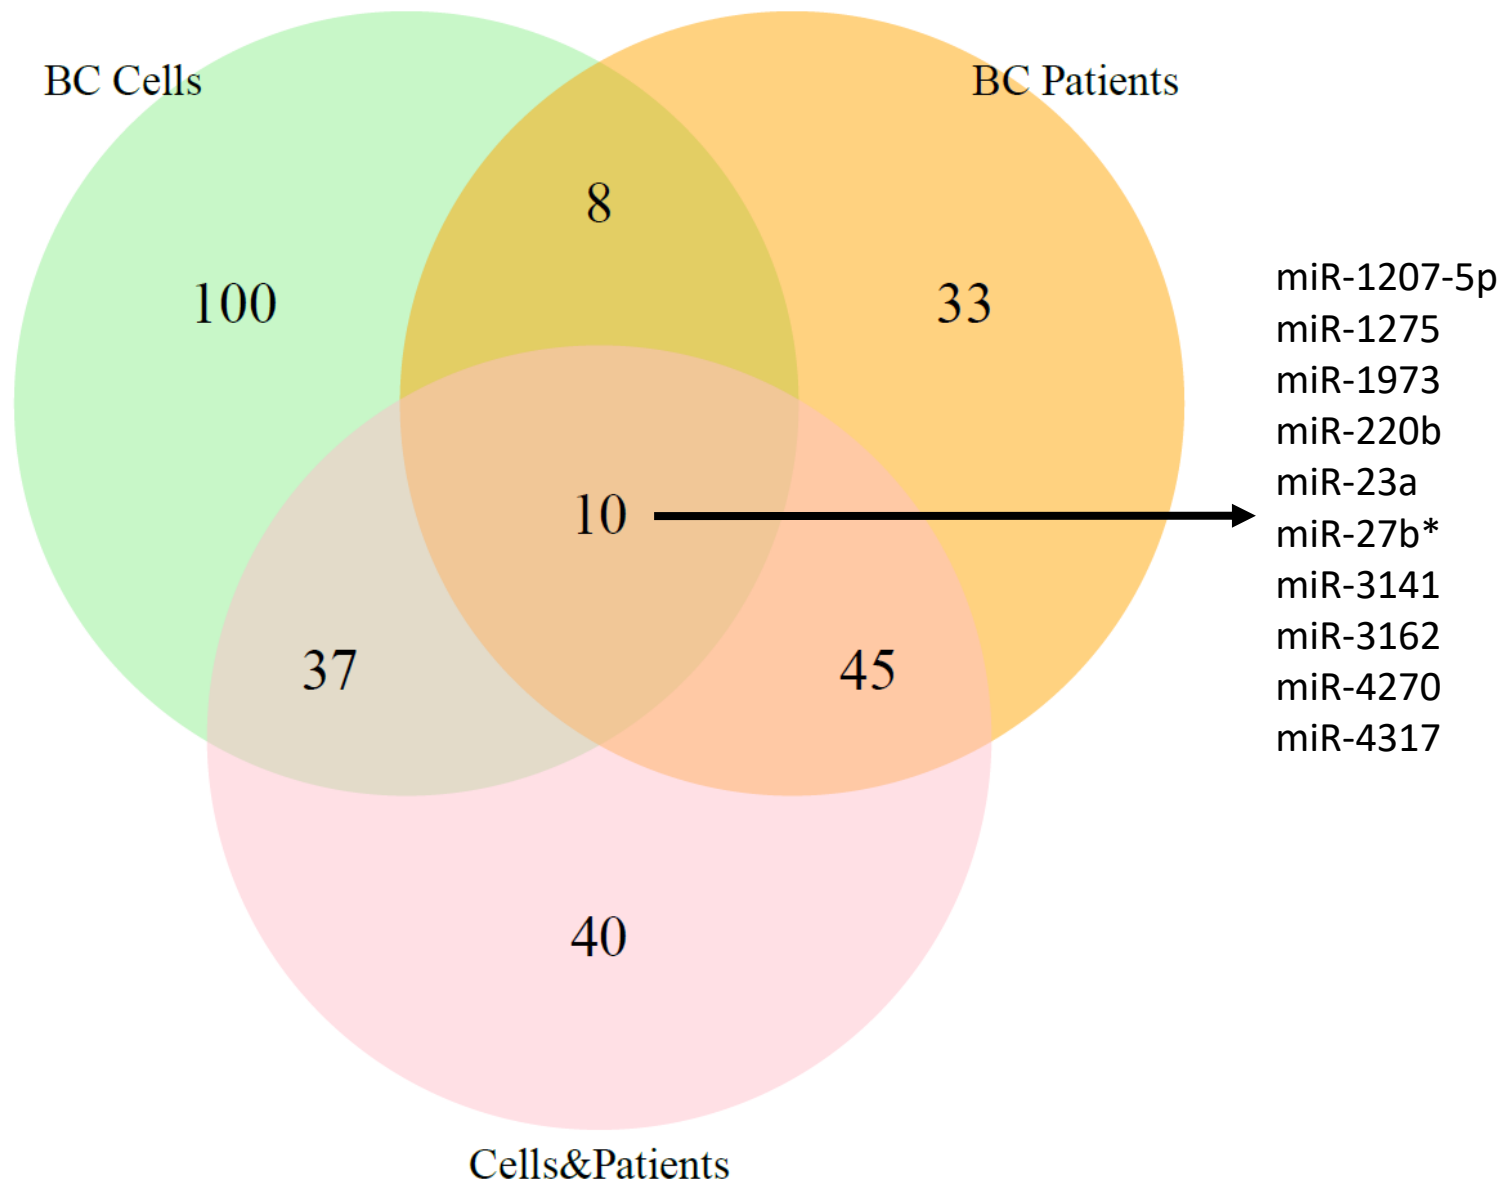

Supplement: sj-pdf-2-bcb-10.1177_1178223420977845.pdf [file sj-pdf-2-bcb-10.1177_1178223420977845.pdf]
